# Supplementary material for: Triplet- vs. singlet-state imposed photochemistry. The role of substituent effects on the photo-Fries and photodissociation reaction of triphenylmethyl silanes
Source: Royal Society of Chemistry journal article supplement (doi:10.1039/b502089a), 2005-05-27
Supplement: b502089a.pdf [file b502089a.pdf]

## Electronic Supplementary Material:

### Triplet- vs. Singlet-State Imposed Photochemistry. The Role of Substituent Effects on the Photo-Fries and Photodissociation Reaction of Triphenylmethyl Silanes

Antonios K. Zarkadis,<sup>\*a</sup> Vassilios Georgakilas,<sup>1a</sup> Gerasimos P. Perdikomatis,<sup>a</sup> Anton Trifonov,<sup>b</sup> Gagik G. Gurzadyan,<sup>b</sup> Stavroula Skoulika,<sup>a</sup> Michael G. Siskos<sup>a</sup>

<sup>a</sup> Department of Chemistry, University of Ioannina, 451 10 Ioannina, Greece. Fax: (+3026510)98799; Tel: (+3026510)98379; E-mail:

azarkad@cc.uoi.gr

<sup>b</sup> Institut für Physikalische und Theoretische Chemie, Technische Universität München, 85748 Garching, Germany Fax: (+4989)28913474; Tel: (+4989)28913449; E-mail: gurzadyan@ch.tum.de

This submission was created using the RSC Article Template (DO NOT DELETE THIS TEXT)

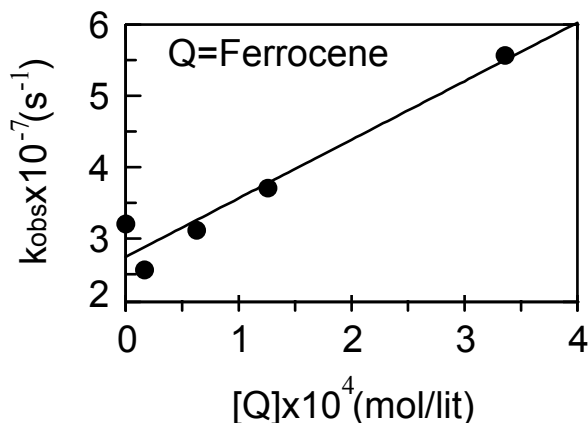

Figure A. Plot of the quenching of the triplet state of **1** (at 520 nm) by ferrocene, using 308-nm laser light (MeCN).

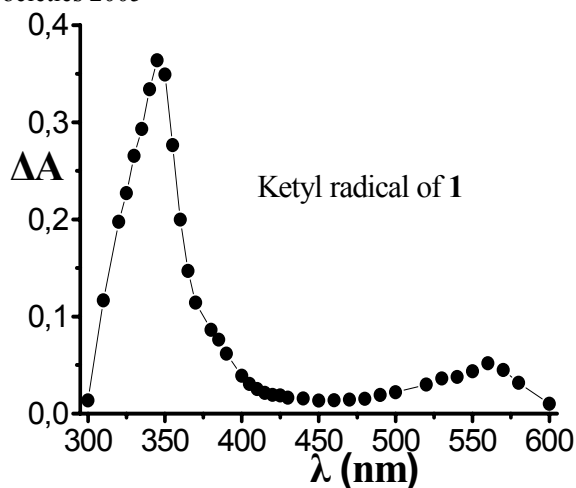

Figure B. Transient absorption spectrum observed 1.62  $\mu$ s after the pulsing (266-nm) of a solution of **1** in cyclohexan in the presence of 0.01 mM Et<sub>3</sub>N under nitrogen. It corresponds to the ketyl radical *p*-(Ph<sub>2</sub>CSiMe<sub>3</sub>)-C<sub>6</sub>H<sub>4</sub>-C(•)(OH)Ph.

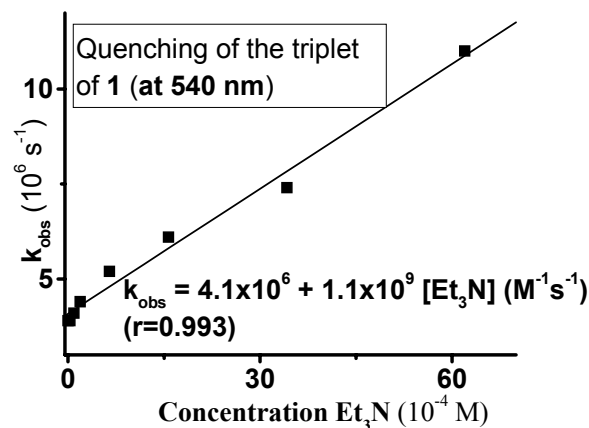

Figure C. Plot of the quenching rate constant of the triplet state of **1** (at 540 nm) by Et<sub>3</sub>N, using 266-nm laser light (hexane).

#### Absorption Coefficient of **6**.

The absorption coefficient value  $\epsilon_6$  of the photo-Fries product **6** (10300 M<sup>-1</sup>cm<sup>-1</sup>) was derived using a linear correlation we found between the  $\epsilon$  values of structurally similar 1,3-exocyclic cyclohexatriens reported in the literature (see structures below, Figure D) and the oscillator strength values (*f*) we calculated using the semiempirical method CNDO/S (see Table A); (a) J. Del Bene, H. H. Jaffe, J. Am. Chem. Soc., 1985, 107, 7767:

$$\epsilon = 25748 \times f, \quad (r=0.977)$$

For compound **1** we calculated *f* = 0.4 and therefore  $\epsilon = 10300$  M<sup>-1</sup>cm<sup>-1</sup>.

**Table A.** Absorption Data of Compounds **A**, **B**, **C**, **D** (see the structures and the plot below)

| Comp.    | Experimental             |                                                          | Calculated <sup>c</sup>  |                                        |
|----------|--------------------------|----------------------------------------------------------|--------------------------|----------------------------------------|
|          | $\lambda_{\max}$<br>(nm) | $\epsilon_{\max}$<br>(M <sup>-1</sup> cm <sup>-1</sup> ) | $\lambda_{\max}$<br>(nm) | <i>f</i><br><i>oscillator strength</i> |
| <b>A</b> | <b>303</b>               | <b>4400<sup>a</sup></b>                                  | <b>304</b>               | <b>0.380</b>                           |
| <b>B</b> | <b>324</b>               | <b>11800<sup>b</sup></b>                                 | <b>317</b>               | <b>0.464</b>                           |
| <b>C</b> | <b>306</b>               | <b>14500<sup>b</sup></b>                                 | <b>302</b>               | <b>0.538</b>                           |
| <b>D</b> | <b>315</b>               | <b>19800<sup>b</sup></b>                                 | <b>307</b>               | <b>0.666</b>                           |

<sup>a</sup>) W. J. Bailey, R. A. Baylouny, *J. Org. Chem.* 1962, **27**, 3476; <sup>b</sup>) H. H. Jaffé, M. Orchin, *Theory and Applications of Ultraviolet Spectroscopy*, Wiley, NY, 1964, p. 200; <sup>c</sup>) Calculated using CNDO/S.

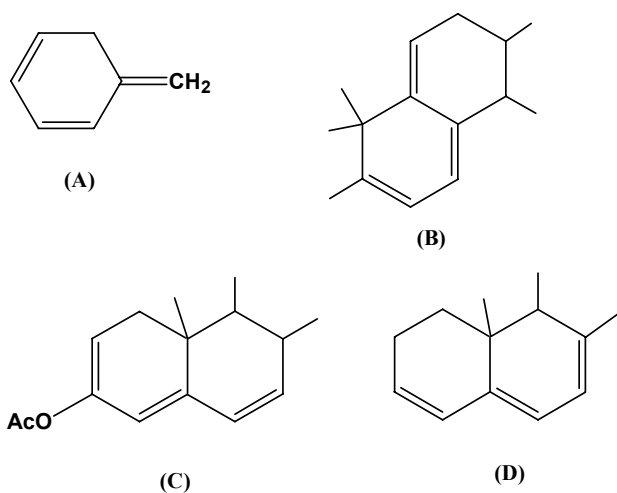

**Figure D.** See for details in **Table A**.
